# Supplementary material for: A Biological Inventory of Prophages in A. baumannii Genomes Reveal Distinct Distributions in Classes, Length, and Genomic Positions
Source: PubMed Central journal article supplement (PMC7744312; doi:10.3389/fmicb.2020.579802), 2020-12-03
Supplement: Image_1.pdf [file Image_1.pdf]

Supplementary Figure S1

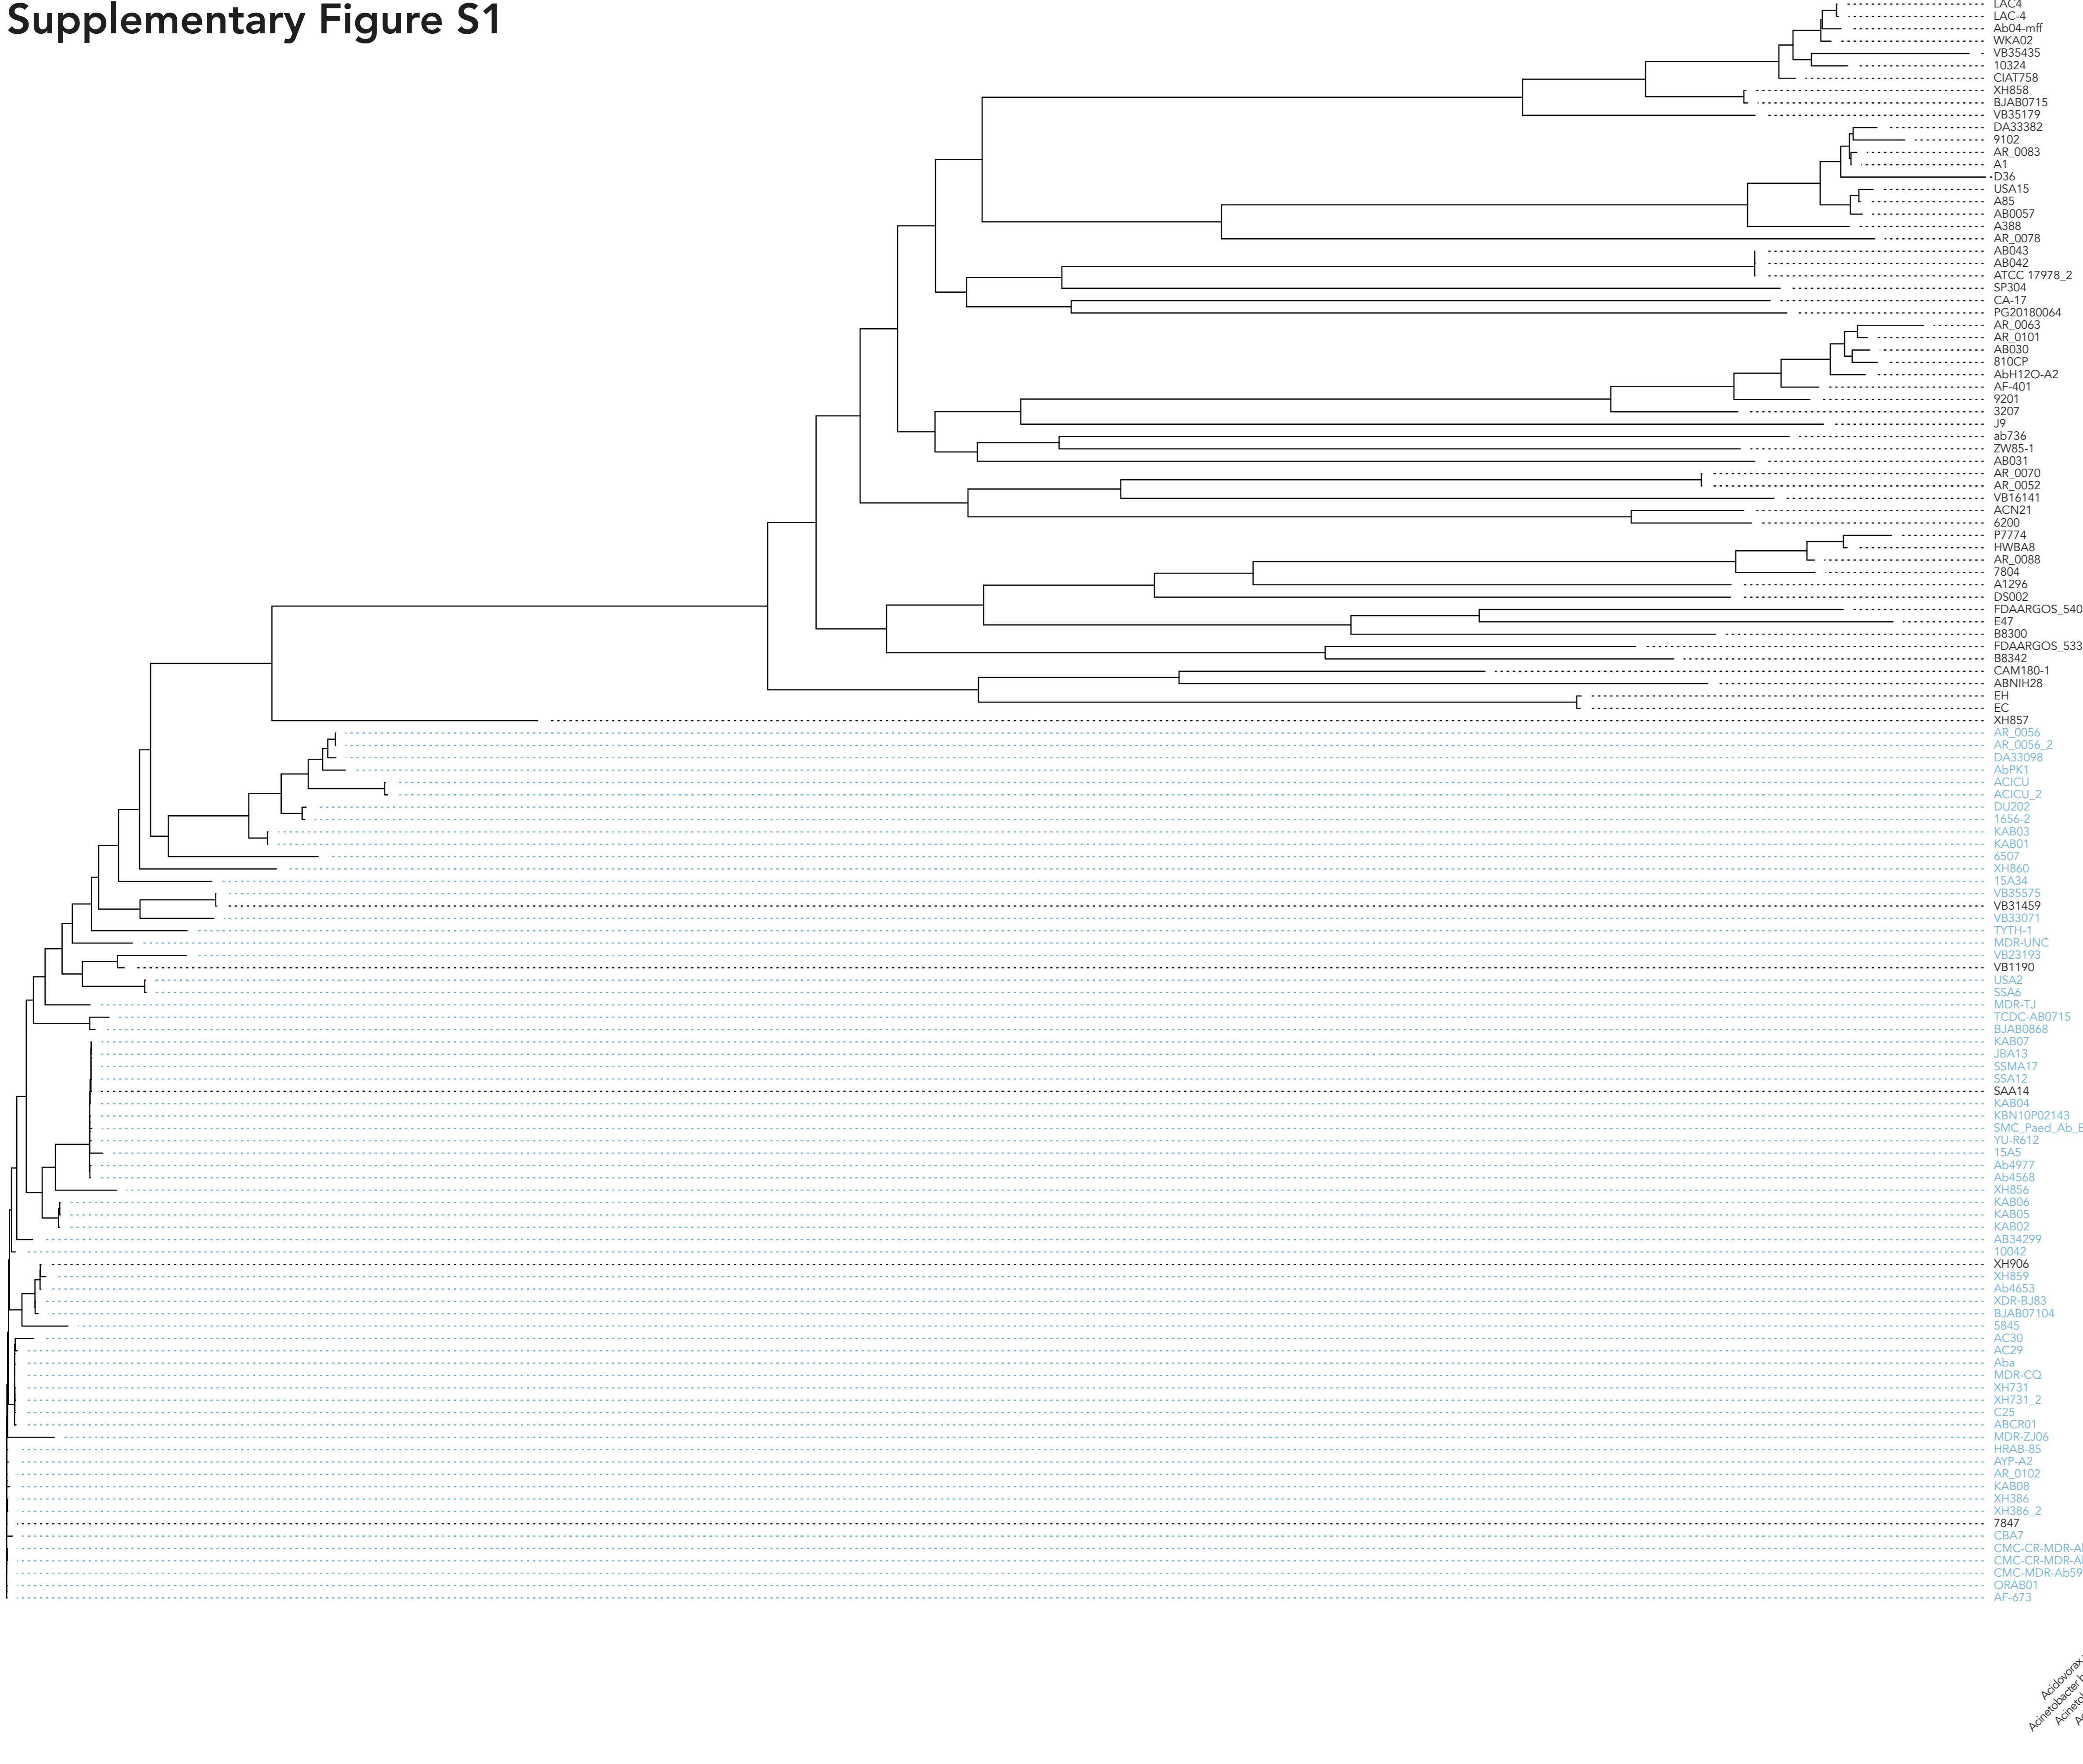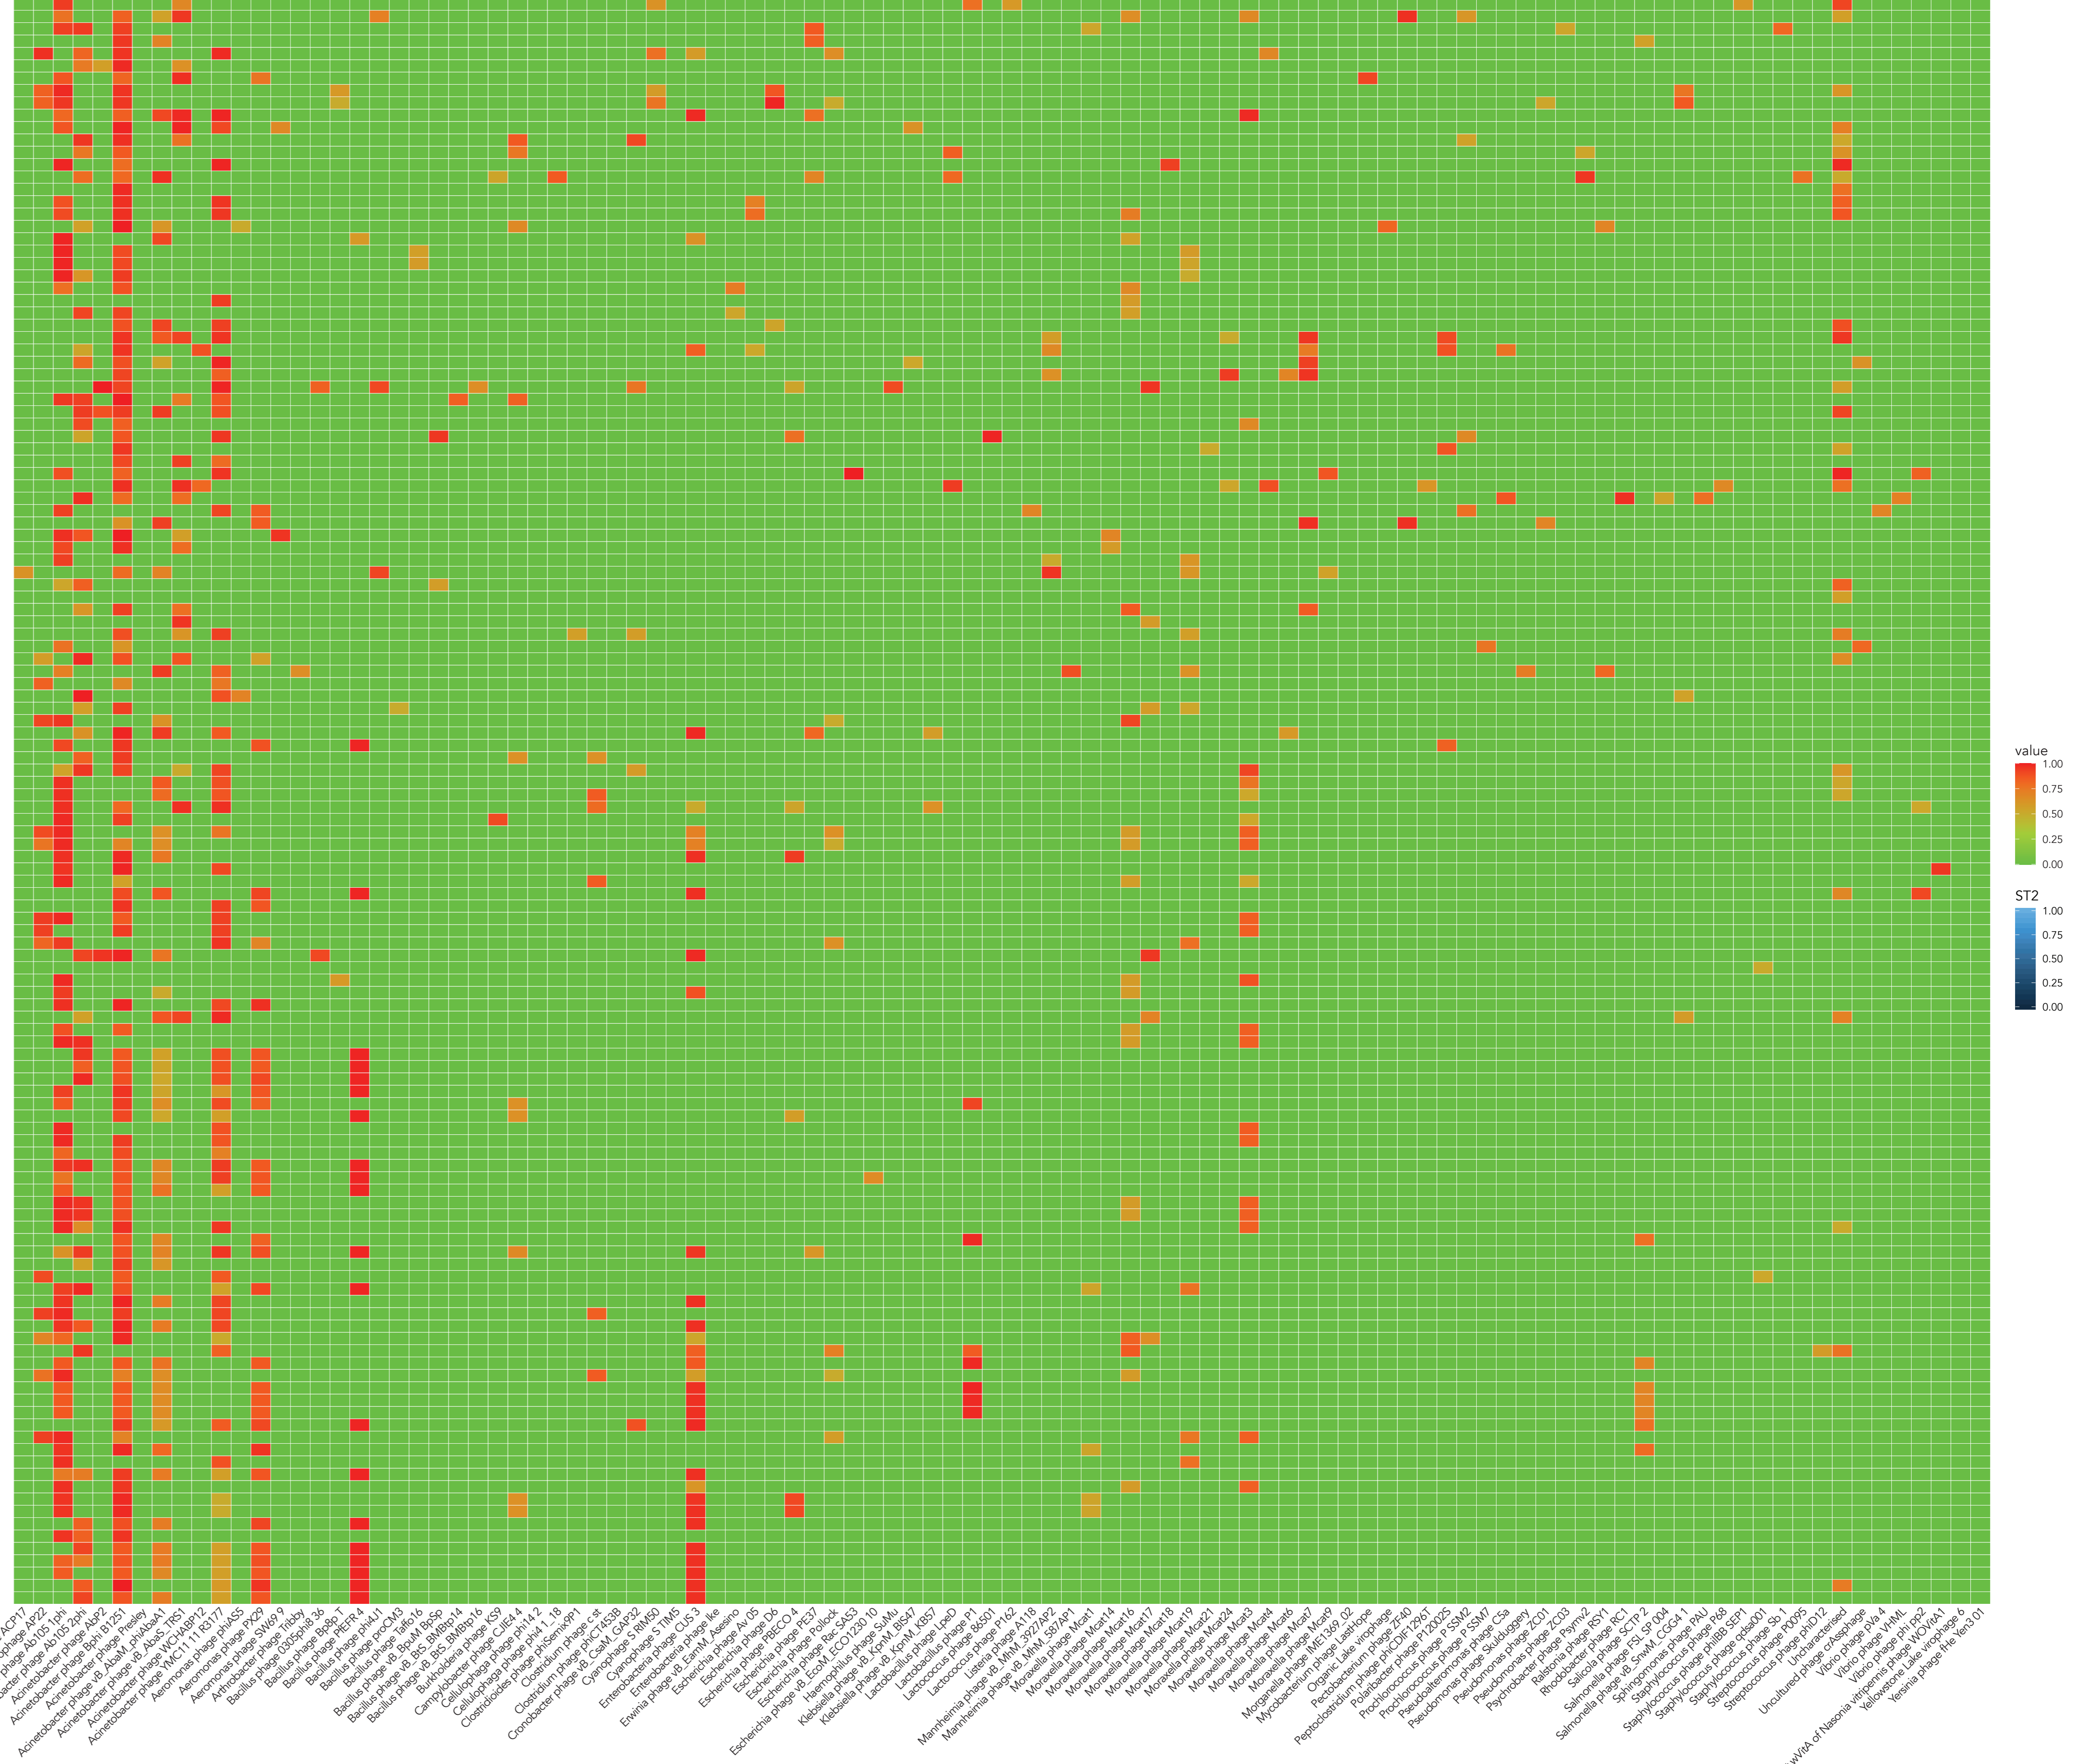

Wolbachia endosymbiont-typha of Helicoverpa...
