# Supplementary material for: A Biological Inventory of Prophages in A. baumannii Genomes Reveal Distinct Distributions in Classes, Length, and Genomic Positions
Source: PubMed Central journal article supplement (PMC7744312; doi:10.3389/fmicb.2020.579802), 2020-12-03

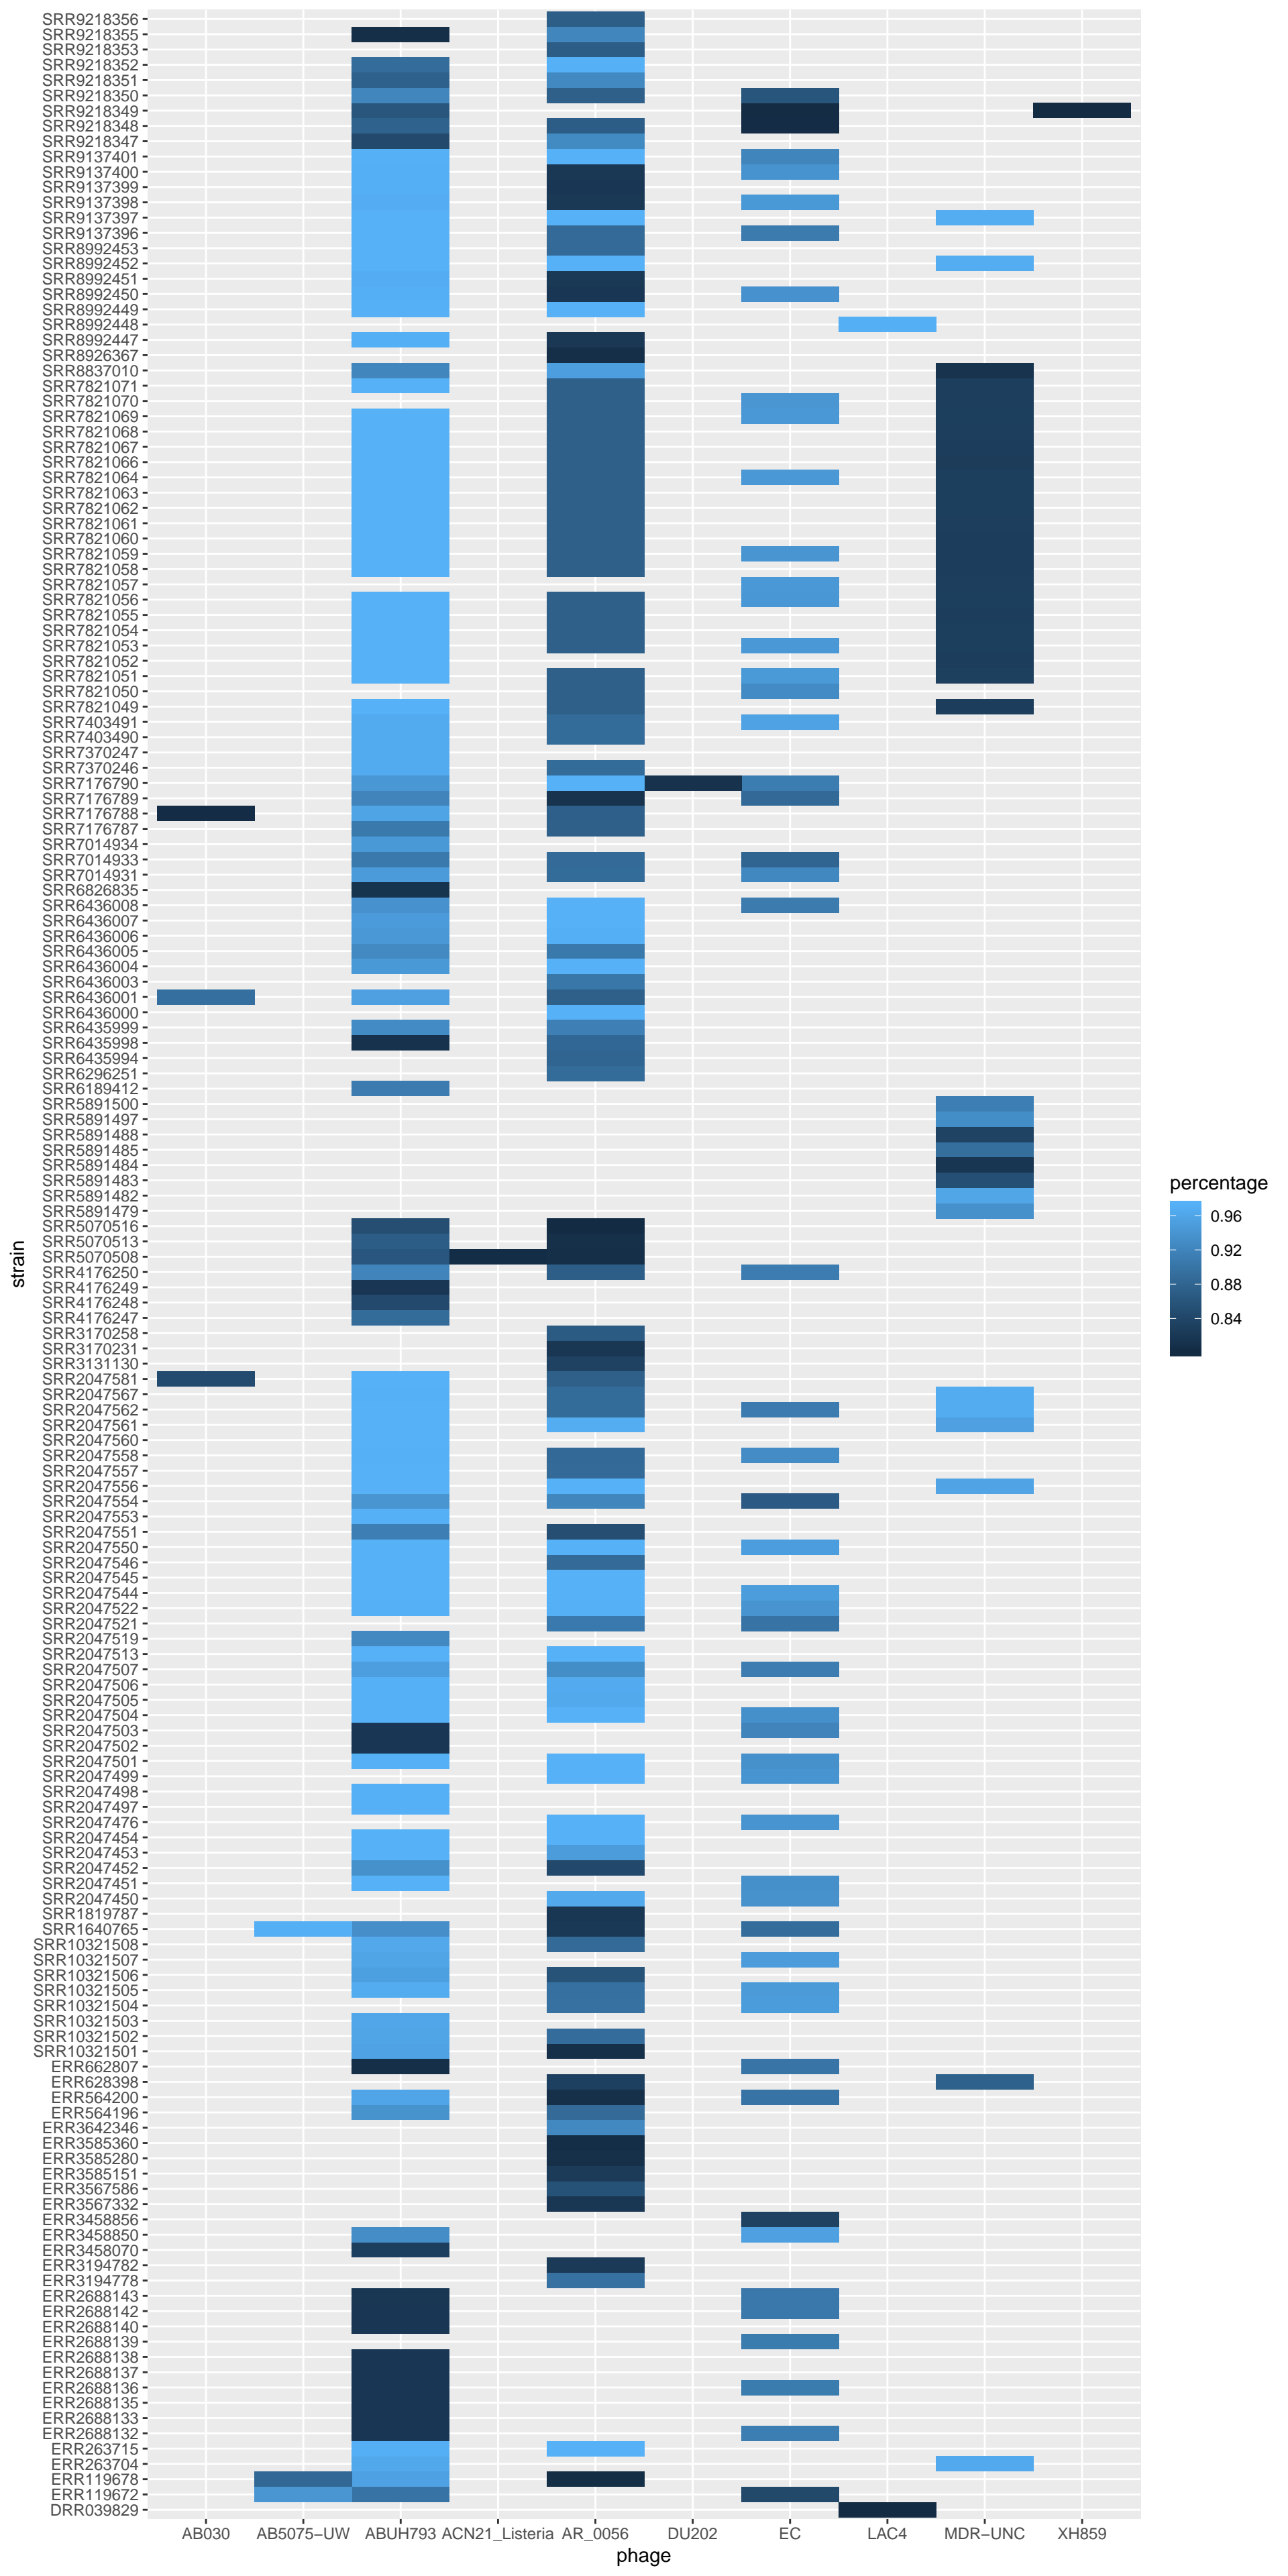

Supplement: Image_3.pdf [file Image_3.pdf]
